# Supplementary material
Source: PubMed Central journal article supplement (PMC8407345)
Supplement: JB00171-21-s0001.pdf [file JB00171-21-s0001.pdf]

Supplementary Material for:

**Hydroxyurea induces a stress response that alters DNA replication and  
nucleotide metabolism in *Bacillus subtilis***

Katherine J. Wozniak and Lyle A. Simmons\*

Department of Molecular, Cellular, and Developmental Biology, University of Michigan,  
Ann Arbor, MI 48109, United States.

\*Corresponding author

LAS: Department of Molecular, Cellular, and Developmental Biology, University of Michigan, Ann Arbor, Michigan 48109-1055, United States. Phone: (734) 763-7142, Fax: (734) 647-0884, E-mail: [lasimm@umich.edu](mailto:lasimm@umich.edu)

Running title: Metabolic stress response to hydroxyurea

Key words: Hydroxyurea, Tn-seq, *Bacillus subtilis*, Ribonucleotide reductase, genome instability

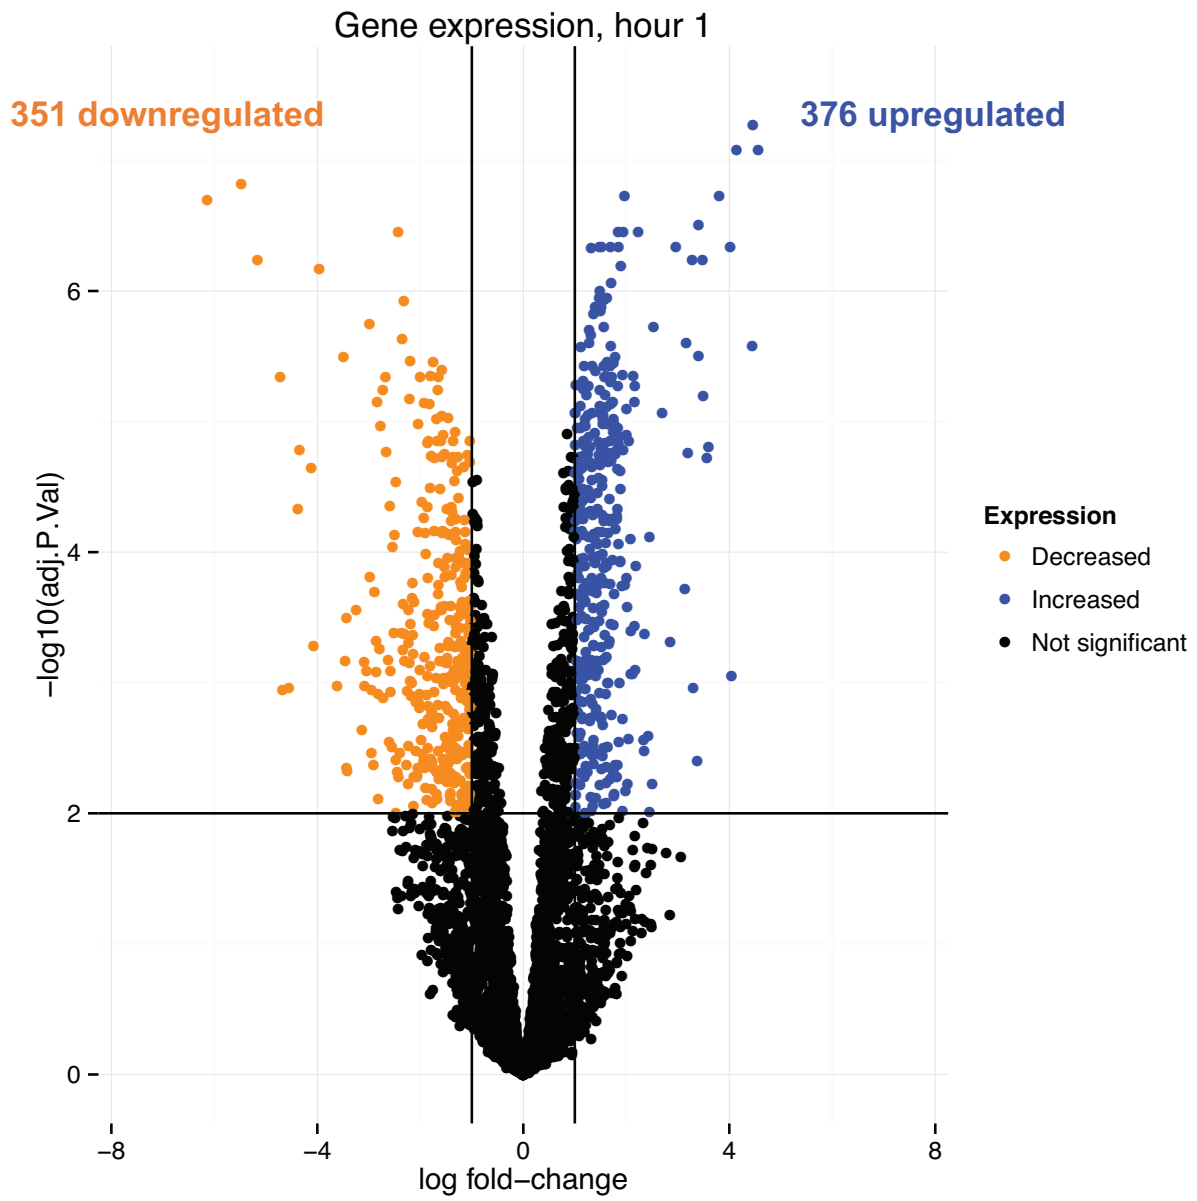

Figure S1. Differential gene expression after 1 hour in hydroxyurea.

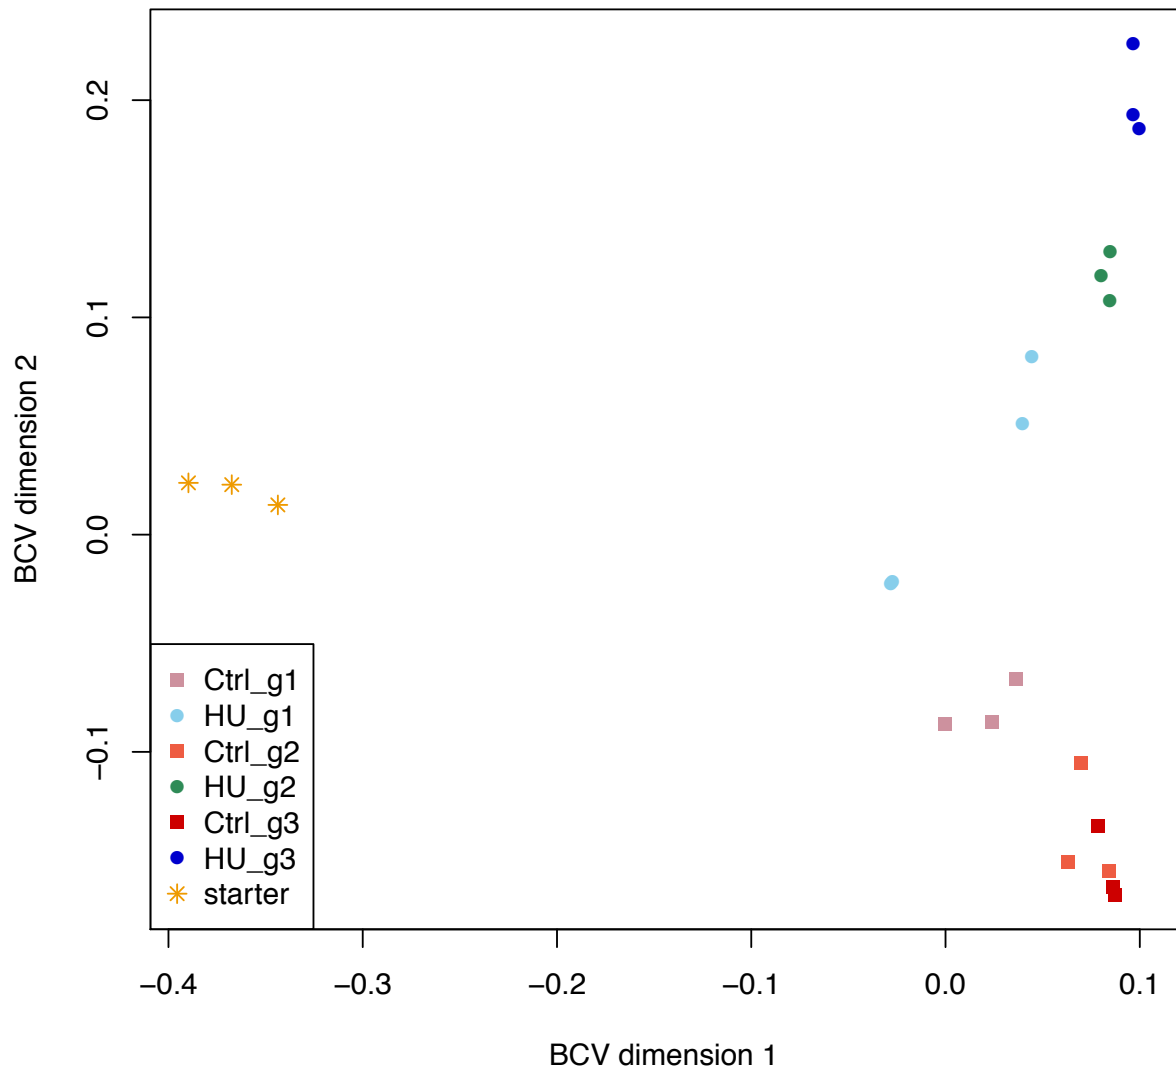

**Figure S2. PCA analysis of Tn-seq fitness data showing clustering of the growth period replicates.**

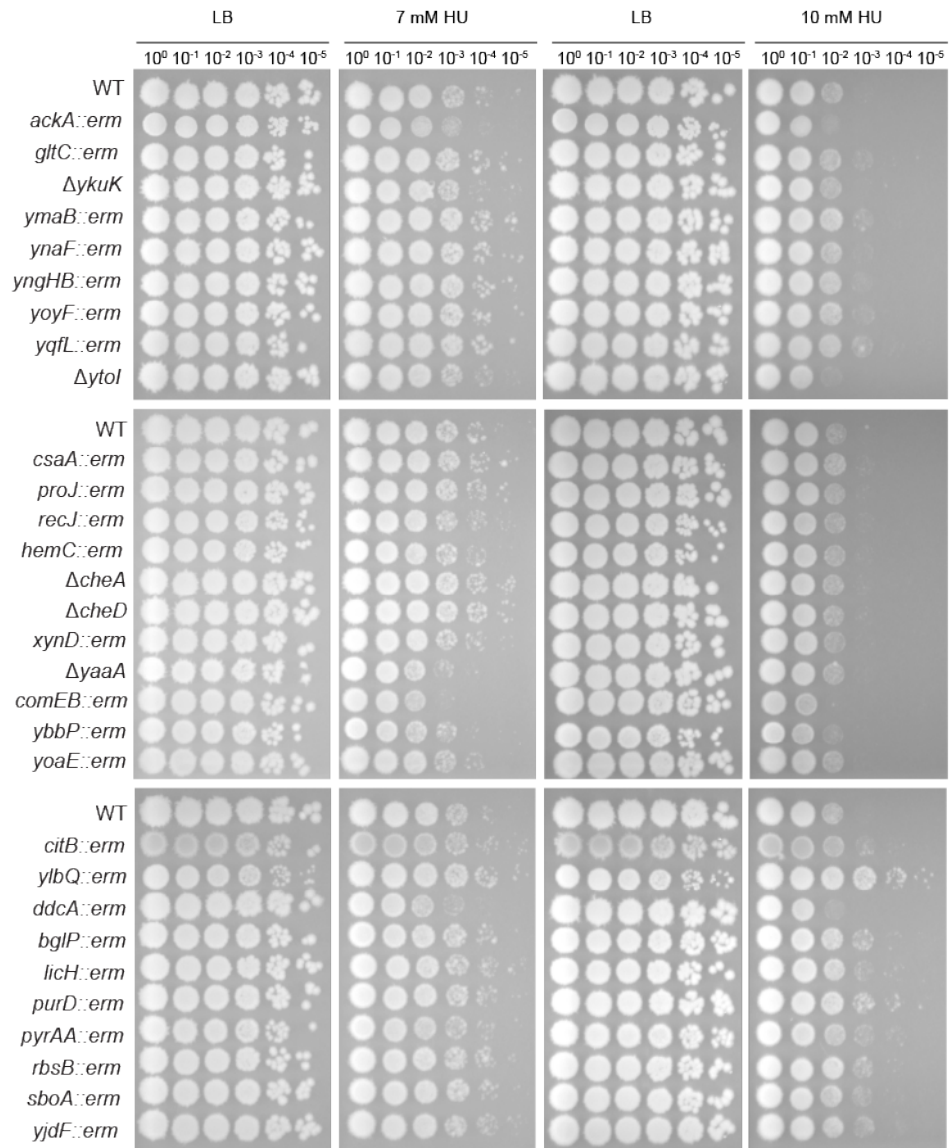

**Figure S3. Tn-seq and RNA-seq hits confer a range of phenotypes on hydroxyurea.** Top hits from Tn-seq (growth 2 and 3) and RNA-seq were deleted and tested for sensitivity on HU. First row of plates were top hits from Tn-seq (growth 2 and 3), the second row of plates were top hits from Tn-seq (growth 2 or 3) and RNA-seq (either hour 1 or 2), and the third row of plates are from RNA-seq.

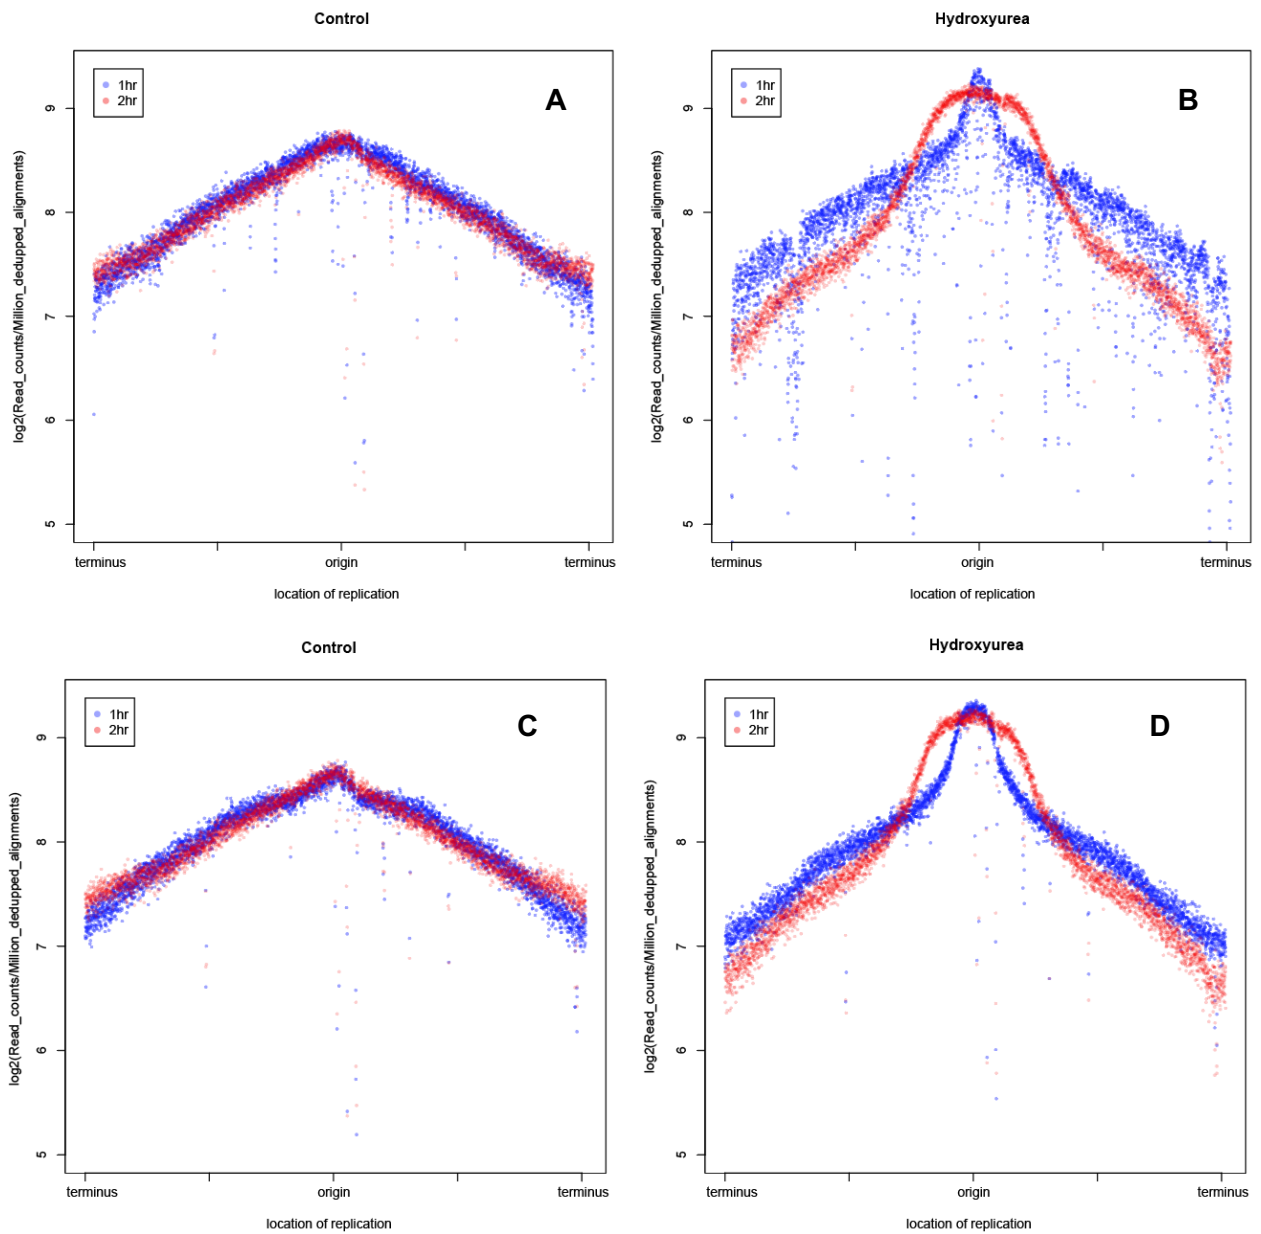

**Figure S4. Hydroxyurea causes slowed DNA replication fork progression.** Left panels show WT grown with vehicle control at one and two hours. The right panels show the replication profile of cells following challenge with HU for one or two hours. One-hour data are shown in blue and the two-hour are shown in red. The data presented here represents the two independent replicates combined in the experiment shown in Figure 4. Replicate #1 is represented by A and B and replicate #2 by C and D.

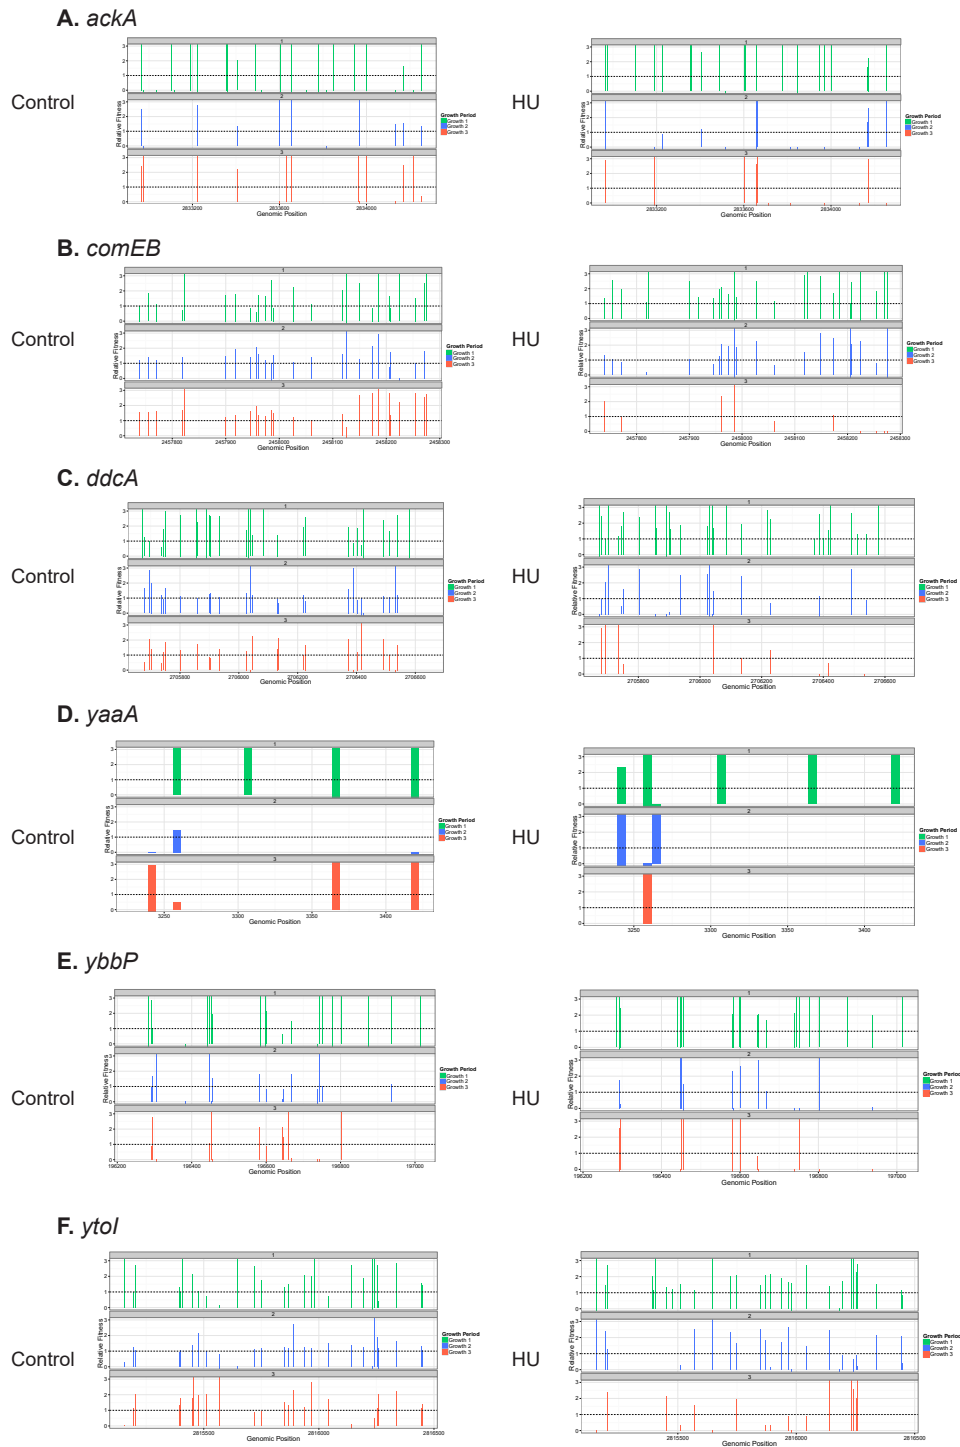

**Figure S5. Insertion maps for top validated genes in control treated (left) and HU treated (right)**

**Table S1. RNA-seq results growth 1 hour (excel spreadsheet)**

**Table S2. RNA-seq results growth 2 hours (excel spreadsheet)**

**Table S3. Tn-seq growth period 2 (excel spreadsheet)**

**Table S4. Tn-seq growth period 3 (excel spreadsheet)**

**Table S5. Summary of Tn-seq and RNA-seq gene hits evaluated**

| Gene              | Deletion phenotype | Relevance                                | Putative function                                | Category                            |
|-------------------|--------------------|------------------------------------------|--------------------------------------------------|-------------------------------------|
| <i>ackA::erm</i>  | sensitive          | Tn-seq growth 2 & 3                      | Acetate kinase                                   | ATP generation                      |
| <i>gltC::erm</i>  | WT                 | Tn-seq growth 2 & 3                      | Transcriptional regulator of glutamate synthesis | Regulator (carbohydrate metabolism) |
| $\Delta ykuK$     | sensitive          | Tn-seq growth 2 & 3                      | Unknown, possibly related to RNase H             | Unknown                             |
| <i>ymaB::erm</i>  | WT                 | Tn-seq growth 2 & 3                      | Nudix hydrolase                                  | mRNA cleavage                       |
| <i>ynaF::erm</i>  | WT                 | Tn-seq growth 2 & 3                      | Unknown                                          | Unknown                             |
| <i>yngHB::erm</i> | WT                 | Tn-seq growth 2 & 3                      | Acyl-CoA carboxylase                             | Leucine utilization                 |
| <i>yoyF::erm</i>  | WT                 | Tn-seq growth 2 & 3                      | Unknown                                          | Unknown                             |
| <i>yqfL::erm</i>  | WT                 | Tn-seq growth 2 & 3                      | Modulator of CcpN                                | Regulator (Carbohydrate metabolism) |
| $\Delta ytol$     | sensitive          | Tn-seq growth 2 & 3                      | Transcriptional regulator                        | Regulator (unknown)                 |
| <i>csaA::erm</i>  | WT                 | Tn-seq growth 2                          | Protein-secretion chaperone                      | Protein secretion                   |
| <i>proJ::erm</i>  | WT                 | Tn-seq growth 2                          | Glutamate 5-kinase                               | Osmotic stress                      |
| <i>recJ::erm</i>  | WT                 | Tn-seq growth 2                          | Exonuclease                                      | DNA replication                     |
| <i>hemC::erm</i>  | WT                 | Tn-seq growth 3                          | Hydroxymethylbilane synthase                     | Heme synthesis                      |
| $\Delta cheA$     | WT                 | Tn-seq growth 2 & 3, RNA-seq hour 1 (up) | Two-component sensor kinase for chemotaxis       | Chemotaxis                          |
| $\Delta cheD$     | WT                 | Tn-seq growth 2 & 3, RNA-seq hour 1 (up) | Chemoreceptor deaminase                          | Chemotaxis                          |
| <i>xynD::erm</i>  | WT                 | Tn-seq growth 2 & 3, RNA-seq hour 1 (up) | Arabinoxylan arabinofuranohydrolase              | Catabolism                          |



|                   |           |                                                  |                                          |                                    |
|-------------------|-----------|--------------------------------------------------|------------------------------------------|------------------------------------|
| <i>ΔyaaA</i>      | sensitive | Tn-seq growth 2 & 3,<br>RNA-seq hour 1<br>(down) | Ribosome assembly<br>factor              | Ribosomal                          |
| <i>comEB::erm</i> | sensitive | Tn-seq growth 2 & 3,<br>RNA-seq hour 2<br>(down) | dCMP deaminase,<br>late competence       | Nucleotide synthesis               |
| <i>ΔybbP</i>      | sensitive | Tn-seq growth 3,<br>RNA-seq hour 1<br>(down)     | Diadenylate cyclase                      | Second messenger<br>synthesis      |
| <i>yoaE::erm</i>  | WT        | Tn-seq growth 2,<br>RNA-seq hour 2 (up)          | Formate<br>dehydrogenase                 | ATP generation                     |
| <i>citB::erm</i>  | resistant | Tn-seq growth 2,<br>RNA-seq hour 1, 2<br>(down)  | Aconitase                                | TCA cycle                          |
| <i>ylbQ::erm</i>  | resistant | Tn-seq growth 2,<br>RNA-seq hour 1, 2<br>(down)  | 2-dehydropantoate<br>2-reductase         | Antimicrobial peptide<br>synthesis |
| <i>ΔddcA</i>      | sensitive | Tn-seq growth 3,<br>RNA-seq hour 1, 2<br>(down)  | DNA damage<br>checkpoint agonist         | DNA repair                         |
| <i>bglP::erm</i>  | resistant | RNA-seq hour 1, 2<br>(down)                      | Beta-glucoside<br>permease               | Phosphotransferase<br>system       |
| <i>lich::erm</i>  | WT        | RNA-seq hour 1, 2<br>(down)                      | 6-phospho-beta-<br>glucosidase           | Phosphotransferase<br>system       |
| <i>purD::erm</i>  | resistant | RNA-seq hour 1, 2<br>(up)                        | Phosphoribosylglyci<br>namide synthetase | Purine synthesis                   |
| <i>pyrAA::erm</i> | WT        | RNA-seq hour 1, 2<br>(up)                        | Carbamoyl-<br>phosphate<br>synthetase    | Pyrimidine<br>biosynthesis         |
| <i>rbsB::erm</i>  | WT        | RNA-seq hour 1, 2<br>(down)                      | Ribose ATP<br>transporter                | Phosphotransferase<br>system       |
| <i>sboA::erm</i>  | WT        | RNA-seq hour 1, 2<br>(up)                        | Subtilisin A                             | Antimicrobial peptide<br>synthesis |
| <i>yjdB::erm</i>  | WT        | RNA-seq hour 1, 2<br>(down)                      | Unknown                                  | Unknown                            |

**Table S6. Strains used in this work**

| <b>Strain</b> | <b>Genotype</b>                            | <b>Origin or construction</b>          |
|---------------|--------------------------------------------|----------------------------------------|
| KJW1          | PY79                                       | (1)                                    |
| KJW5          | <i>recA::recA-GFP</i> (spec <sup>R</sup> ) | (2)                                    |
| KJW7          | <i>tagC::tagC-GFP</i> (spec <sup>R</sup> ) | (3)                                    |
| KJW41         | <i>comEB::erm</i>                          | BKE25580 into PY79                     |
| KJW47         | $\Delta yaaA$                              | BKE00030 into PY79, <i>erm</i> removed |
| KJW49         | $\Delta ytol$                              | BKE29270 into PY79, <i>erm</i> removed |
| KJW51         | $\Delta ykuK$                              | BKE14110 into PY79, <i>erm</i> removed |
| KJW53         | $\Delta cheA$                              | BKE16430 into PY79, <i>erm</i> removed |
| KJW55         | $\Delta cheD$                              | BKE16460 into PY79, <i>erm</i> removed |
| KJW71         | $\Delta rnhC$                              | JRR84(5-7)                             |
| KJW125        | <i>proJ::erm</i>                           | BKE18470 into PY79                     |
| KJW127        | <i>yoaE::erm</i>                           | BKE18570 into PY79                     |
| KJW129        | <i>citB::erm</i>                           | BKE18000 into PY79                     |
| KJW131        | <i>hemC::erm</i>                           | BKE28150 into PY79                     |
| KJW133        | <i>ybbP::erm</i>                           | BKE01750 into PY79                     |
| KJW135        | <i>ddcA::erm</i>                           | BKE28540 into PY79                     |
| KJW137        | <i>ymaB::erm</i>                           | BKE17400 into PY79                     |
| KJW139        | <i>yqfL::erm</i>                           | BKE25240 into PY79                     |
| KJW141        | <i>recJ::erm</i>                           | BKE27620 into PY79                     |
| KJW143        | <i>gltC::erm</i>                           | BKE18460 into PY79                     |
| KJW145        | <i>yoyF::erm</i>                           | BKE19669 into PY79                     |
| KJW147        | <i>yngHB::erm</i>                          | BKE18239 into PY79                     |
| KJW149        | <i>ynaF::erm</i>                           | BKE17540 into PY79                     |
| KJW268        | $\Delta polA$                              | (4, 5)                                 |
| KJW325        | $\Delta uvrA$                              | PEB307 (4)                             |

**Table S6. Continued Strains used in this work**

| <b>Strain</b> | <b>Genotype</b>                                                       | <b>Origin or construction</b>                                            |
|---------------|-----------------------------------------------------------------------|--------------------------------------------------------------------------|
| KJW329        | <i>ylbQ::erm</i>                                                      | BKE 15110 into PY79                                                      |
| KJW350        | <i>csaA::erm</i>                                                      | BKE19040 into PY79                                                       |
| KJW353        | <i>ackA::erm</i>                                                      | BKE29470 into PY79                                                       |
| KJW355        | <i>xynD::erm</i>                                                      | BKE18160 into PY79                                                       |
| KJW396        | <i>purD::erm</i>                                                      | BKE06530 into PY79                                                       |
| KJW398        | <i>yjdB::erm</i>                                                      | BKE12030 into PY79                                                       |
| KJW402        | <i>rbsB::erm</i>                                                      | BKE35960 into PY79                                                       |
| KJW404        | <i>sboA::erm</i>                                                      | BKE37350 into PY79                                                       |
| KJW406        | <i>lich::erm</i>                                                      | BKE38560 into PY79                                                       |
| KJW407        | <i>bglP::erm</i>                                                      | BKE39270 into PY79                                                       |
| KJW494        | <i>recU::erm</i>                                                      | PEB125 (6)                                                               |
| KJW495        | $\Delta recA$                                                         | PEB214 (6)                                                               |
| KJW541        | <i>amyE::Pspac-nrdIEF-ymaB</i> (spec <sup>R</sup> )                   | (8)                                                                      |
| KJW548        | <i>amyE::Pspac-nrdIEF-ymaB</i> (spec <sup>R</sup> ), $\Delta polA$    | gDNA from KJW541 transformed into KJW268                                 |
| KJW550        | <i>amyE::Pspac-nrdIEF-ymaB</i> (spec <sup>R</sup> ), $\Delta uvrA$    | gDNA from KJW541 transformed into KJW325                                 |
| KJW552        | <i>amyE::Pspac-nrdIEF-ymaB</i> (spec <sup>R</sup> ), $\Delta rnhC$    | gDNA from KJW541 transformed into KJW71                                  |
| KJW554        | <i>amyE::Pspac-nrdIEF-ymaB</i> (spec <sup>R</sup> ), <i>recU::erm</i> | gDNA from KJW541 transformed into KJW494                                 |
| KJW738        | $\Delta ybbP$                                                         | Cre-lox cure of <i>erm</i> cassette by pDR244 transformation into KJW133 |
| KJW740        | $\Delta ddcA$                                                         | Cre-lox cure of <i>erm</i> cassette by pDR244 transformation into KJW135 |

## REFERENCES

1. Youngman P, Perkins JB, Losick R. 1984. Construction of a cloning site near one end of Tn917 into which foreign DNA may be inserted without affecting transposition in *Bacillus subtilis* or expression of the transposon-borne *erm* gene. *Plasmid* 12:1-9.
2. Simmons LA, Grossman AD, Walker GC. 2007. Replication is required for the RecA localization response to DNA damage in *Bacillus subtilis*. *Proc Natl Acad Sci U S A* 104:1360-5.
3. Simmons LA, Goranov AI, Kobayashi H, Davies BW, Yuan DS, Grossman AD, Walker GC. 2009. Comparison of responses to double-strand breaks between *Escherichia coli* and *Bacillus subtilis* reveals different requirements for SOS induction. *J Bacteriol* 191:1152-61.
4. Schroeder JW, Randall JR, Hirst WG, O'Donnell ME, Simmons LA. 2017. Mutagenic cost of ribonucleotides in bacterial DNA. *Proc Natl Acad Sci U S A* 114:11733-11738.
5. Randall JR, Nye TM, Wozniak KJ, Simmons LA. 2019. RNase HIII Is Important for Okazaki Fragment Processing in *Bacillus subtilis*. *J Bacteriol* 201: pii: e00686-18.
6. Burby PE, Simmons LA. 2016. MutS2 promotes homologous recombination in *Bacillus subtilis*. *J Bacteriol* doi:10.1128/JB.00682-16.
7. Randall JR, Hirst WG, Simmons LA. 2017. Substrate specificity for bacterial RNase HII and HIII is influenced by metal availability. *J Bacteriol* 200:pii: e00401-17.
8. Zhang Y, Stubbe J. 2011. *Bacillus subtilis* class Ib ribonucleotide reductase is a dimanganese(III)-tyrosyl radical enzyme. *Biochemistry* 50:5615-23.
